# Supplementary material
Source: PubMed Central journal article supplement (PMC1904148)

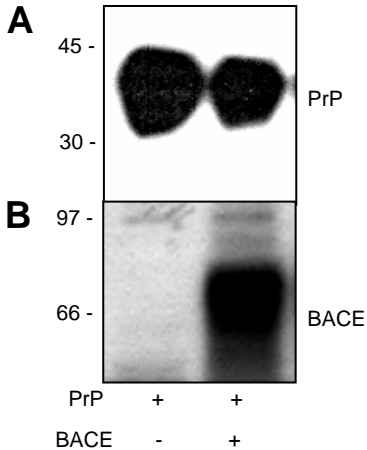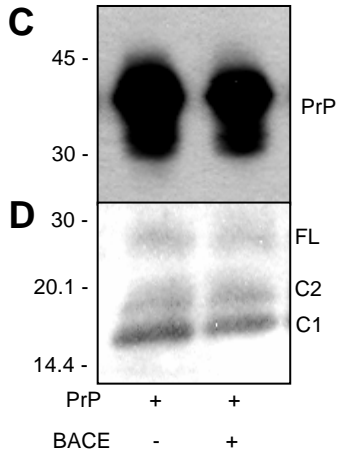

Supplement: pnas_0609621104_3.pdf [file pnas_0609621104_3.pdf]

BACE activity (% of control)

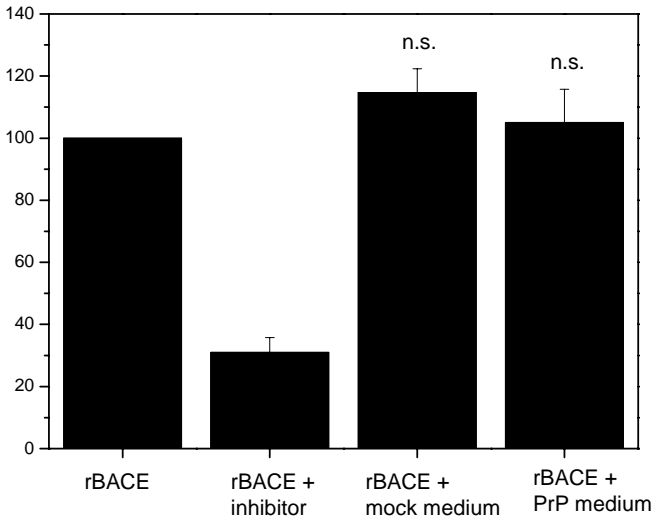

Supplement: pnas_0609621104_4.pdf [file pnas_0609621104_4.pdf]
